# Supplementary material for: ﻿Phylogenomics of paleoendemic lampshade spiders (Araneae, Hypochilidae, Hypochilus), with the description of a new species from montane California
Source: Zookeys. 2022 Feb 17;1086:163–204. doi: 10.3897/zookeys.1086.77190 (PMC8873193; doi:10.3897/zookeys.1086.77190)
Supplement: Supplementary material 2 — Appendix II [file zookeys-1086-163-s002.xlsx]

## Sheet: Appendix II
CAT #	Collectors	FIELD #	Event date (YYYY-MM-DD)	Scientific Name	Genetic Lineage and/or drainage basin	Lifestage	SEX	State	County	Specific Locality	Decimal latitude	Decimal longitude	Datum	Elev (m)		VOUCHER	F_IMAGED	M_SEM	PTW (@ 4X)	PTL (@ 4X)	PTW/PTL mm	CdL (@ 4X)	CdL mm	AME (@ 4X)	AME mm	PTaL (@ 4X)	PTaL mm	CTpr	CTre		Habitat
SDSU_H0025	M Hedin		1993-07-10	Hypochilus bernardino	bernardino	imm		CA	San Bernardino	Camp Creek, east of Forest Falls	34.0761	-116.888	WGS84																		amongst granite boulders along stream
SDSU_H0026	M Hedin		1993-07-10	Hypochilus bernardino	bernardino	imm		CA	San Bernardino	Camp Creek, east of Forest Falls	34.0761	-116.888	WGS84																		amongst granite boulders along stream
SDSU_H0027	M Hedin		1993-07-10	Hypochilus bernardino	bernardino	imm		CA	San Bernardino	Camp Creek, east of Forest Falls	34.0761	-116.888	WGS84																		amongst granite boulders along stream
SDSU_G2893	E Ciaccio	EAC 18_003	2018-08-04	Hypochilus bernardino	bernardino	adult	F	CA	San Bernardino	Hwy 38, Forsee Creek, along stream and tunnel under highway	34.1574	-116.931	WGS84	1850		voucher in 80/legs in 100%	sperm imaged														conifer forest, on granite walls and overhangs along stream, few web scars and fewer spiders. Most spiders in tunnel under highway
SDSU_G2894	E Ciaccio	EAC 18_003	2018-08-04	Hypochilus bernardino	bernardino	imm	F	CA	San Bernardino	Hwy 38, Forsee Creek, along stream and tunnel under highway	34.1574	-116.931	WGS84	1850																	conifer forest, on granite walls and overhangs along stream, few web scars and fewer spiders. Most spiders in tunnel under highway
SDSU_G2895	E Ciaccio	EAC 18_003	2018-08-04	Hypochilus bernardino	bernardino	imm	F	CA	San Bernardino	Hwy 38, Forsee Creek, along stream and tunnel under highway	34.1574	-116.931	WGS84	1850																	conifer forest, on granite walls and overhangs along stream, few web scars and fewer spiders. Most spiders in tunnel under highway
SDSU_G2896	E Ciaccio	EAC 18_003	2018-08-04	Hypochilus bernardino	bernardino	imm	M	CA	San Bernardino	Hwy 38, Forsee Creek, along stream and tunnel under highway	34.1574	-116.931	WGS84	1850																	conifer forest, on granite walls and overhangs along stream, few web scars and fewer spiders. Most spiders in tunnel under highway
SDSU_G2897	E Ciaccio	EAC 18_004	2018-08-04	Hypochilus bernardino	bernardino	imm	M	CA	San Bernardino	Hwy 38, tributary into East Fork Mountain Home Creek, in culvert and tunnel under highway	34.1199	-116.977	WGS84	1554																	mixed conifer forest, few spiders and web scars on granite boulders in culvert. Most in large (6m) diameter tunnel running under highway
SDSU_G2898	E Ciaccio	EAC 18_004	2018-08-04	Hypochilus bernardino	bernardino	imm		CA	San Bernardino	Hwy 38, tributary into East Fork Mountain Home Creek, in culvert and tunnel under highway	34.1199	-116.977	WGS84	1554																	mixed conifer forest, few spiders and web scars on granite boulders in culvert. Most in large (6m) diameter tunnel running under highway
SDSU_G2899	E Ciaccio	EAC 18_004	2018-08-04	Hypochilus bernardino	bernardino	imm		CA	San Bernardino	Hwy 38, tributary into East Fork Mountain Home Creek, in culvert and tunnel under highway	34.1199	-116.977	WGS84	1554																	mixed conifer forest, few spiders and web scars on granite boulders in culvert. Most in large (6m) diameter tunnel running under highway
SDSU_G2929	E Ciaccio	EAC 18_005	2018-09-27	Hypochilus bernardino	bernardino	adult	M	CA	San Bernardino	Hwy 38, tributary into East Fork Mountain Home Creek, in culvert and tunnel under highway	34.1199	-116.977	WGS84	1554		voucher in 80/legs in 100%			20	77	0.25974	20	0.5	5	0.125	40	1	4	3		mixed conifer forest, few spiders and web scars on granite boulders in culvert. Most in large (6m) diameter tunnel running under highway
SDSU_G2930	E Ciaccio	EAC 18_005	2018-09-27	Hypochilus bernardino	bernardino	adult	M	CA	San Bernardino	Hwy 38, tributary into East Fork Mountain Home Creek, in culvert and tunnel under highway	34.1199	-116.977	WGS84	1554		voucher in 80/legs in 100%			19	75	0.253333	20	0.5	4	0.1	33	0.825	5	2		mixed conifer forest, few spiders and web scars on granite boulders in culvert. Most in large (6m) diameter tunnel running under highway
SDSU_G2931	E Ciaccio	EAC 18_005	2018-09-27	Hypochilus bernardino	bernardino	adult	M	CA	San Bernardino	Hwy 38, tributary into East Fork Mountain Home Creek, in culvert and tunnel under highway	34.1199	-116.977	WGS84	1554		voucher in 80/legs in 100%		prep #14 - EAC 18_005, G2931 (#14)	20	79	0.253165	20	0.5	5	0.125	38	0.95	5	2		mixed conifer forest, few spiders and web scars on granite boulders in culvert. Most in large (6m) diameter tunnel running under highway
SDSU_G2932	E Ciaccio	EAC 18_005	2018-09-27	Hypochilus bernardino	bernardino	adult	M	CA	San Bernardino	Hwy 38, tributary into East Fork Mountain Home Creek, in culvert and tunnel under highway	34.1199	-116.977	WGS84	1554		voucher in 80/legs in 100%		prep #15 - EAC 18_005, G2932 (#15)	19	71	0.267606	19	0.475	5	0.125	34	0.85	5	2		mixed conifer forest, few spiders and web scars on granite boulders in culvert. Most in large (6m) diameter tunnel running under highway
																			40 = 1 mm
SDSU_H0842	M Hedin, R Keith	MCH 09_074	2009-08-23	Hypochilus petrunkevitchi	petrunk, Kaweah	adult	M	CA	Tulare	below Atwell Mill CG, along Kaweah River	36.4584	-118.656	WGS84																		granite above, along river
SDSU_H0843	M Hedin, R Keith	MCH 09_074	2009-08-23	Hypochilus petrunkevitchi	petrunk, Kaweah	adult	F	CA	Tulare	below Atwell Mill CG, along Kaweah River	36.4584	-118.656	WGS84																		granite above, along river
SDSU_H0844	M Hedin, R Keith	MCH 09_074	2009-08-23	Hypochilus petrunkevitchi	petrunk, Kaweah	imm		CA	Tulare	below Atwell Mill CG, along Kaweah River	36.4584	-118.656	WGS84																		granite above, along river
SDSU_H0020	M Hedin		1993-07-12	Hypochilus petrunkevitchi	petrunk, Kaweah			CA	Tulare	Sequoia NP, Hwy 198, Big Fern Springs pullout	36.538	-118.774	WGS84																		rock faces near spring
SDSU_H0021	M Hedin		1993-07-12	Hypochilus petrunkevitchi	petrunk, Kaweah			CA	Tulare	Sequoia NP, Hwy 198, Big Fern Springs pullout	36.538	-118.774	WGS84																		rock faces near spring
SDSU_H0022	M Hedin		1993-07-12	Hypochilus petrunkevitchi	petrunk, Kaweah			CA	Tulare	Sequoia NP, Hwy 198, Big Fern Springs pullout	36.538	-118.774	WGS84																		rock faces near spring
SDSU_G2256	E Ciaccio	EAC 16_002	2016-08-16	Hypochilus petrunkevitchi	petrunk, Kaweah	adult	F	CA	Tulare	Sequoia NP, Atwell-Hockett Trail, bridge on trail	36.4584	-118.656	WGS84	1801		voucher in 80/legs in 100%															Up and down bridge on wall faces and overhangs
SDSU_G2257	E Ciaccio	EAC 16_002	2016-08-16	Hypochilus petrunkevitchi	petrunk, Kaweah	imm	M	CA	Tulare	Sequoia NP, Atwell-Hockett Trail, bridge on trail	36.4584	-118.656	WGS84	1801																	Up and down bridge on wall faces and overhangs
SDSU_G2258	E Ciaccio	EAC 16_002	2016-08-16	Hypochilus petrunkevitchi	petrunk, Kaweah	adult	M	CA	Tulare	Sequoia NP, Atwell-Hockett Trail, bridge on trail	36.4584	-118.656	WGS84	1801																	Up and down bridge on wall faces and overhangs
SDSU_G2259	E Ciaccio	EAC 16_002	2016-08-16	Hypochilus petrunkevitchi	petrunk, Kaweah	adult	M	CA	Tulare	Sequoia NP, Atwell-Hockett Trail, bridge on trail	36.4584	-118.656	WGS84	1801																	Up and down bridge on wall faces and overhangs
SDSU_G2260	E Ciaccio	EAC 16_002	2016-08-16	Hypochilus petrunkevitchi	petrunk, Kaweah	adult	M	CA	Tulare	Sequoia NP, Atwell-Hockett Trail, bridge on trail	36.4584	-118.656	WGS84	1801		voucher in 80/legs in 100%			22	80	0.275	24	0.6	5	0.125	38	0.95	4	2		Up and down bridge on wall faces and overhangs
SDSU_G2266	E Ciaccio	EAC 16_004	2016-08-17	Hypochilus petrunkevitchi	petrunk, Kaweah	adult	F	CA	Tulare	Sequoia NP, bridge over Marble Fork on road to Crystal Cave	36.5759	-118.786	WGS84	1575																	N-facing vertical rock faces
SDSU_G2267	E Ciaccio	EAC 16_004	2016-08-17	Hypochilus petrunkevitchi	petrunk, Kaweah	imm	M	CA	Tulare	Sequoia NP, bridge over Marble Fork on road to Crystal Cave	36.5759	-118.786	WGS84	1575																	N-facing vertical rock faces
SDSU_G2268	E Ciaccio	EAC 16_004	2016-08-17	Hypochilus petrunkevitchi	petrunk, Kaweah	adult	F	CA	Tulare	Sequoia NP, bridge over Marble Fork on road to Crystal Cave	36.5759	-118.786	WGS84	1575																	N-facing vertical rock faces
SDSU_G2269	E Ciaccio	EAC 16_004	2016-08-17	Hypochilus petrunkevitchi	petrunk, Kaweah	adult	F	CA	Tulare	Sequoia NP, bridge over Marble Fork on road to Crystal Cave	36.5759	-118.786	WGS84	1575																	N-facing vertical rock faces
SDSU_G2270	E Ciaccio	EAC 16_004	2016-08-17	Hypochilus petrunkevitchi	petrunk, Kaweah	adult	F	CA	Tulare	Sequoia NP, bridge over Marble Fork on road to Crystal Cave	36.5759	-118.786	WGS84	1575																	N-facing vertical rock faces
SDSU_G2487	E Ciaccio	EAC 17_007	2017-07-29	Hypochilus petrunkevitchi	petrunk, Kaweah	adult	F	CA	Tulare	Sequoia NP, Hwy 198 near lodgepole CG, Marble Fork Kaweah river	36.6037	-118.739	WGS84	2020																	N-side of fork. Open coniferous riparian. Vert/overhangs on granite boulders
SDSU_G2488	E Ciaccio	EAC 17_007	2017-07-29	Hypochilus petrunkevitchi	petrunk, Kaweah	adult	M	CA	Tulare	Sequoia NP, Hwy 198 near lodgepole CG, Marble Fork Kaweah river	36.6037	-118.739	WGS84	2020																	N-side of fork. Open coniferous riparian. Vert/overhangs on granite boulders
SDSU_G2489	E Ciaccio	EAC 17_007	2017-07-29	Hypochilus petrunkevitchi	petrunk, Kaweah	imm	M	CA	Tulare	Sequoia NP, Hwy 198 near lodgepole CG, Marble Fork Kaweah river	36.6037	-118.739	WGS84	2020		voucher in 80%/legs in 100%															N-side of fork. Open coniferous riparian. Vert/overhangs on granite boulders
SDSU_G2490	E Ciaccio	EAC 17_007	2017-07-29	Hypochilus petrunkevitchi	petrunk, Kaweah	adult	M	CA	Tulare	Sequoia NP, Hwy 198 near lodgepole CG, Marble Fork Kaweah river	36.6037	-118.739	WGS84	2020																	N-side of fork. Open coniferous riparian. Vert/overhangs on granite boulders
SDSU_G2491	E Ciaccio	EAC 17_007	2017-07-29	Hypochilus petrunkevitchi	petrunk, Kaweah	adult	M	CA	Tulare	Sequoia NP, Hwy 198 near lodgepole CG, Marble Fork Kaweah river	36.6037	-118.739	WGS84	2020																	N-side of fork. Open coniferous riparian. Vert/overhangs on granite boulders
SDSU_G2261	E Ciaccio	EAC 16_003	2016-08-17	Hypochilus petrunkevitchi	petrunk, Kaweah	imm	M	CA	Tulare	Sequoia NP, Hwy 198, Big Fern Springs	36.5382	-118.775	WGS84	1183																	Vertical rock faces and overhangs
SDSU_G2262	E Ciaccio	EAC 16_003	2016-08-17	Hypochilus petrunkevitchi	petrunk, Kaweah	adult	M	CA	Tulare	Sequoia NP, Hwy 198, Big Fern Springs	36.5382	-118.775	WGS84	1183		voucher in 80/legs in 100%			na	na	na	26	0.65	4	0.1	na	na	5	2		Vertical rock faces and overhangs
SDSU_G2263	E Ciaccio	EAC 16_003	2016-08-17	Hypochilus petrunkevitchi	petrunk, Kaweah	adult	F	CA	Tulare	Sequoia NP, Hwy 198, Big Fern Springs	36.5382	-118.775	WGS84	1183		voucher in 80/legs in 100%															Vertical rock faces and overhangs
SDSU_G2264	E Ciaccio	EAC 16_003	2016-08-17	Hypochilus petrunkevitchi	petrunk, Kaweah	adult	F	CA	Tulare	Sequoia NP, Hwy 198, Big Fern Springs	36.5382	-118.775	WGS84	1183																	Vertical rock faces and overhangs
SDSU_G2265	E Ciaccio	EAC 16_003	2016-08-17	Hypochilus petrunkevitchi	petrunk, Kaweah	adult	F	CA	Tulare	Sequoia NP, Hwy 198, Big Fern Springs	36.5382	-118.775	WGS84	1183																	Vertical rock faces and overhangs
SDSU_G2273	E Ciaccio, B Hernadez, S Torres	EAC 16_007	2016-09-03	Hypochilus petrunkevitchi	petrunk, Kaweah	imm	M	CA	Tulare	Sequoia NP, Ladybug Trail, upstream from bridge at start of trail	36.3501	-118.762	WGS84	1130
SDSU_G2274	E Ciaccio, B Hernadez, S Torres	EAC 16_007	2016-09-03	Hypochilus petrunkevitchi	petrunk, Kaweah	adult	M	CA	Tulare	Sequoia NP, Ladybug Trail, upstream from bridge at start of trail	36.3501	-118.762	WGS84	1130		voucher in 80/legs in 100%			24	81	0.296296	24	0.6	4	0.1	42	1.05	5	2
SDSU_G2275	E Ciaccio, B Hernadez, S Torres	EAC 16_007	2016-09-03	Hypochilus petrunkevitchi	petrunk, Kaweah	adult	F	CA	Tulare	Sequoia NP, Ladybug Trail, upstream from bridge at start of trail	36.3501	-118.762	WGS84	1130		voucher in 80/legs in 100%	sperm imaged
SDSU_G2276	E Ciaccio, B Hernadez, S Torres	EAC 16_007	2016-09-03	Hypochilus petrunkevitchi	petrunk, Kaweah	adult	F	CA	Tulare	Sequoia NP, Ladybug Trail, upstream from bridge at start of trail	36.3501	-118.762	WGS84	1130
SDSU_G2277	E Ciaccio, B Hernadez, S Torres	EAC 16_007	2016-09-03	Hypochilus petrunkevitchi	petrunk, Kaweah	adult	F	CA	Tulare	Sequoia NP, Ladybug Trail, upstream from bridge at start of trail	36.3501	-118.762	WGS84	1130
SDSU_G2278	E Ciaccio, B Hernadez, S Torres	EAC 16_007	2016-09-03	Hypochilus petrunkevitchi	petrunk, Kaweah	adult	M	CA	Tulare	Sequoia NP, Ladybug Trail, upstream from bridge at start of trail	36.3501	-118.762	WGS84	1130
SDSU_G2271	E Ciaccio	EAC 16_005	2016-08-18	Hypochilus petrunkevitchi	petrunk, Kaweah	imm		CA	Tulare	Sequoia NP, Middle fork trail	36.5416	-118.707	WGS84	1337																	Shady oak grove w/ W-facing rock outcrops. Cool mosit area w/no nearby water
SDSU_G2284	E Ciaccio, B Hernadez, S Torres	EAC 16_009	2016-09-04	Hypochilus petrunkevitchi	petrunk, Kaweah	adult	M	CA	Tulare	Sequoia NP, Middle Fork Trail, Mehrten Creek	36.5457	-118.692	WGS84	1420																	Rock outcroppings upstream of campsite; shady pine grove. Stream was dry
SDSU_G2285	E Ciaccio, B Hernadez, S Torres	EAC 16_009	2016-09-04	Hypochilus petrunkevitchi	petrunk, Kaweah	adult	M	CA	Tulare	Sequoia NP, Middle Fork Trail, Mehrten Creek	36.5457	-118.692	WGS84	1420		voucher in 80%/legs in 100%			23	75	0.306667	23	0.575	5	0.125	37	0.925	5	2		Rock outcroppings upstream of campsite; shady pine grove. Stream was dry
SDSU_G2286	E Ciaccio, B Hernadez, S Torres	EAC 16_009	2016-09-04	Hypochilus petrunkevitchi	petrunk, Kaweah	adult	F	CA	Tulare	Sequoia NP, Middle Fork Trail, Mehrten Creek	36.5457	-118.692	WGS84	1420		voucher in 80%/legs in 100%															Rock outcroppings upstream of campsite; shady pine grove. Stream was dry
SDSU_G2287	E Ciaccio, B Hernadez, S Torres	EAC 16_009	2016-09-04	Hypochilus petrunkevitchi	petrunk, Kaweah	adult	F	CA	Tulare	Sequoia NP, Middle Fork Trail, Mehrten Creek	36.5457	-118.692	WGS84	1420																	Rock outcroppings upstream of campsite; shady pine grove. Stream was dry
SDSU_G2288	E Ciaccio, B Hernadez, S Torres	EAC 16_009	2016-09-04	Hypochilus petrunkevitchi	petrunk, Kaweah	imm	M	CA	Tulare	Sequoia NP, Middle Fork Trail, Mehrten Creek	36.5457	-118.692	WGS84	1420																	Rock outcroppings upstream of campsite; shady pine grove. Stream was dry
SDSU_G2272	E Ciaccio	EAC 16_006	2016-08-18	Hypochilus petrunkevitchi	petrunk, Kaweah	imm	M	CA	Tulare	Sequoia NP, Middle Fork Trail, near Mehrten Creek	36.5456	-118.692	WGS84	1420																	Rock outcroppings upstream of campsite; shady pine grove. Small pools of standing water
SDSU_G2482	E Ciaccio	EAC 17_006	2017-07-28	Hypochilus petrunkevitchi	petrunk, Kaweah	adult	M	CA	Tulare	Sequoia NP, Mineral King Rd., Squirrel Creek pullout	36.4428	-118.769	WGS84	1000																	Oak riparian. N-facing granite cliff and boulders
SDSU_G2483	E Ciaccio	EAC 17_006	2017-07-28	Hypochilus petrunkevitchi	petrunk, Kaweah	adult	M	CA	Tulare	Sequoia NP, Mineral King Rd., Squirrel Creek pullout	36.4428	-118.769	WGS84	1000																	Oak riparian. N-facing granite cliff and boulders
SDSU_G2484	E Ciaccio	EAC 17_006	2017-07-28	Hypochilus petrunkevitchi	petrunk, Kaweah	imm	M	CA	Tulare	Sequoia NP, Mineral King Rd., Squirrel Creek pullout	36.4428	-118.769	WGS84	1000		voucher in 80%/legs in 100%															Oak riparian. N-facing granite cliff and boulders
SDSU_G2485	E Ciaccio	EAC 17_006	2017-07-28	Hypochilus petrunkevitchi	petrunk, Kaweah	adult	F	CA	Tulare	Sequoia NP, Mineral King Rd., Squirrel Creek pullout	36.4428	-118.769	WGS84	1000		voucher in 80%/legs in 100%	sperm imaged														Oak riparian. N-facing granite cliff and boulders
SDSU_G2486	E Ciaccio	EAC 17_006	2017-07-28	Hypochilus petrunkevitchi	petrunk, Kaweah	imm		CA	Tulare	Sequoia NP, Mineral King Rd., Squirrel Creek pullout	36.4428	-118.769	WGS84	1000																	Oak riparian. N-facing granite cliff and boulders
SDSU_G2251	E Ciaccio	EAC 16_001	2016-08-16	Hypochilus petrunkevitchi	petrunk, Kaweah	adult	F	CA	Tulare	Sequoia NP, Mineral King Rd., turnout on the road	36.4535	-118.704	WGS84	1744																	Stream at turnout; upstream on vertical rock faces
SDSU_G2252	E Ciaccio	EAC 16_001	2016-08-16	Hypochilus petrunkevitchi	petrunk, Kaweah	adult	F	CA	Tulare	Sequoia NP, Mineral King Rd., turnout on the road	36.4535	-118.704	WGS84	1744																	Stream at turnout; upstream on vertical rock faces
SDSU_G2253	E Ciaccio	EAC 16_001	2016-08-16	Hypochilus petrunkevitchi	petrunk, Kaweah	adult	F	CA	Tulare	Sequoia NP, Mineral King Rd., turnout on the road	36.4535	-118.704	WGS84	1744																	Stream at turnout; upstream on vertical rock faces
SDSU_G2254	E Ciaccio	EAC 16_001	2016-08-16	Hypochilus petrunkevitchi	petrunk, Kaweah	adult	F	CA	Tulare	Sequoia NP, Mineral King Rd., turnout on the road	36.4535	-118.704	WGS84	1744																	Stream at turnout; upstream on vertical rock faces
SDSU_G2255	E Ciaccio	EAC 16_001	2016-08-16	Hypochilus petrunkevitchi	petrunk, Kaweah	adult	F	CA	Tulare	Sequoia NP, Mineral King Rd., turnout on the road	36.4535	-118.704	WGS84	1744																	Stream at turnout; upstream on vertical rock faces
SDSU_TAC000192	M Hedin	MCH 09_075	2009-08-24	Hypochilus petrunkevitchi	petrunk, Kaweah	adult	M	CA	Tulare	Sequoia NP, Mineral King Road, crossing of Redwood Creek, W of Atwell Mill CG	36.4533	-118.704	WGS84	~1740				prep #19 - SDSU_TAC000192	23	84	0.27381	27	0.675	5	0.125	46	1.15	5	2		stream culvert
SDSU_TAC000193	M Hedin	MCH 09_075	2009-08-24	Hypochilus petrunkevitchi	petrunk, Kaweah	adult	F	CA	Tulare	Sequoia NP, Mineral King Road, crossing of Redwood Creek, W of Atwell Mill CG	36.4533	-118.704	WGS84	~1740																	stream culvert
SDSU_G2279	E Ciaccio, B Hernadez, S Torres	EAC 16_008	2016-09-04	Hypochilus petrunkevitchi	petrunk, Kaweah	adult	M	CA	Tulare	Sequoia NP, South Fork Kaweah River, jnct of Cedar Creek and South Fork Kaweah River	36.3551	-118.733	WGS84	1460		voucher in 80/legs in 100%			21	71	0.295775	23	0.575	5	0.125	37	0.925	5	2		Walls of canyon; mix coniferous/oak
SDSU_G2280	E Ciaccio, B Hernadez, S Torres	EAC 16_008	2016-09-04	Hypochilus petrunkevitchi	petrunk, Kaweah	adult	F	CA	Tulare	Sequoia NP, South Fork Kaweah River, jnct of Cedar Creek and South Fork Kaweah River	36.3551	-118.733	WGS84	1460																	Walls of canyon; mix coniferous/oak
SDSU_G2281	E Ciaccio, B Hernadez, S Torres	EAC 16_008	2016-09-04	Hypochilus petrunkevitchi	petrunk, Kaweah	adult	F	CA	Tulare	Sequoia NP, South Fork Kaweah River, jnct of Cedar Creek and South Fork Kaweah River	36.3551	-118.733	WGS84	1460																	Walls of canyon; mix coniferous/oak
SDSU_G2282	E Ciaccio, B Hernadez, S Torres	EAC 16_008	2016-09-04	Hypochilus petrunkevitchi	petrunk, Kaweah	adult	F	CA	Tulare	Sequoia NP, South Fork Kaweah River, jnct of Cedar Creek and South Fork Kaweah River	36.3551	-118.733	WGS84	1460																	Walls of canyon; mix coniferous/oak
SDSU_G2283	E Ciaccio, B Hernadez, S Torres	EAC 16_008	2016-09-04	Hypochilus petrunkevitchi	petrunk, Kaweah	imm	F	CA	Tulare	Sequoia NP, South Fork Kaweah River, jnct of Cedar Creek and South Fork Kaweah River	36.3551	-118.733	WGS84	1460																	Walls of canyon; mix coniferous/oak
SDSU_G2505	E Ciaccio	EAC 17_011	2017-07-31	Hypochilus petrunkevitchi	petrunk, Kings	adult	F	CA	Fresno	Bretz Mill, Providence Creek	37.0427	-119.237	WGS84	1070																	Coniferous riparian, very few spiders on rocks. Hvy conc. in drainpipe under road
SDSU_G2506	E Ciaccio	EAC 17_011	2017-07-31	Hypochilus petrunkevitchi	petrunk, Kings	imm	M	CA	Fresno	Bretz Mill, Providence Creek	37.0427	-119.237	WGS84	1070																	Coniferous riparian, very few spiders on rocks. Hvy conc. in drainpipe under road
SDSU_G2507	E Ciaccio	EAC 17_011	2017-07-31	Hypochilus petrunkevitchi	petrunk, Kings	adult	F	CA	Fresno	Bretz Mill, Providence Creek	37.0427	-119.237	WGS84	1070																	Coniferous riparian, very few spiders on rocks. Hvy conc. in drainpipe under road
SDSU_G2508	E Ciaccio	EAC 17_011	2017-07-31	Hypochilus petrunkevitchi	petrunk, Kings	adult	F	CA	Fresno	Bretz Mill, Providence Creek	37.0427	-119.237	WGS84	1070		voucher in 80/legs in 100%	sperm imaged														Coniferous riparian, very few spiders on rocks. Hvy conc. in drainpipe under road
SDSU_G2509	E Ciaccio	EAC 17_011	2017-07-31	Hypochilus petrunkevitchi	petrunk, Kings	imm	M	CA	Fresno	Bretz Mill, Providence Creek	37.0427	-119.237	WGS84	1070																	Coniferous riparian, very few spiders on rocks. Hvy conc. in drainpipe under road
SDSU_G2551	E Ciaccio	EAC 17_017	2017-09-09	Hypochilus petrunkevitchi	petrunk, Kings	imm		CA	Fresno	King's Canyon NP, dam at Sheep Creek on Don Cecil Trail	36.784	-118.678	WGS84	1531																	Pine/oak mix, shaded N-facing canyon stream. Many webs seen but very few spiders. On vert cliffs and granite overhangs
SDSU_G2549	E Ciaccio	EAC 17_016	2017-09-09	Hypochilus petrunkevitchi	petrunk, Kings	imm		CA	Fresno	King's Canyon NP, Road's end permit station, Bubbs Creek/Zumwalt mdw trail jct	36.7918	-118.587	WGS84	1560																	In massive granite boulder "caves". Sparse webs, majority empty, few web scars. N-facing boulder fields
SDSU_G2550	E Ciaccio	EAC 17_016	2017-09-09	Hypochilus petrunkevitchi	petrunk, Kings	adult	F	CA	Fresno	King's Canyon NP, Road's end permit station, Bubbs Creek/Zumwalt mdw trail jct	36.7918	-118.587	WGS84	1560																	In massive granite boulder "caves". Sparse webs, majority empty, few web scars. N-facing boulder fields
SDSU_G2542	E Ciaccio	EAC 17_014	2017-09-08	Hypochilus petrunkevitchi	petrunk, Kings	imm	F	CA	Fresno	Sequoia NF, Hwy 245 at Mill Creek, ~1 mi S of Hwy 180 Jct	36.7145	-118.988	WGS84	1513																	Pred. pine w/oak mix. two drainage pipes under road. Many web scars, few spiders.
SDSU_G2543	E Ciaccio	EAC 17_014	2017-09-08	Hypochilus petrunkevitchi	petrunk, Kings	adult	F	CA	Fresno	Sequoia NF, Hwy 245 at Mill Creek, ~1 mi S of Hwy 180 Jct	36.7145	-118.988	WGS84	1513		voucher in 80/legs in 100%	sperm imaged														Pred. pine w/oak mix. two drainage pipes under road. Many web scars, few spiders.
SDSU_G2544	E Ciaccio	EAC 17_014	2017-09-08	Hypochilus petrunkevitchi	petrunk, Kings	imm		CA	Fresno	Sequoia NF, Hwy 245 at Mill Creek, ~1 mi S of Hwy 180 Jct	36.7145	-118.988	WGS84	1513																	Pred. pine w/oak mix. two drainage pipes under road. Many web scars, few spiders.
SDSU_G2545	E Ciaccio	EAC 17_014	2017-09-08	Hypochilus petrunkevitchi	petrunk, Kings	adult	F	CA	Fresno	Sequoia NF, Hwy 245 at Mill Creek, ~1 mi S of Hwy 180 Jct	36.7145	-118.988	WGS84	1513																	Pred. pine w/oak mix. two drainage pipes under road. Many web scars, few spiders.
SDSU_G2552	E Ciaccio	EAC 17_018	2017-09-09	Hypochilus petrunkevitchi	petrunk, Kings	adult	F	CA	Fresno	Sequoia NF, Mill Flat OHV Staging Area	36.7471	-119.005	WGS84	1150																	Coniferous riarian. Few spiders seen. Vertical/overhangs of granite boulders along stream.
SDSU_G2553	E Ciaccio	EAC 17_018	2017-09-09	Hypochilus petrunkevitchi	petrunk, Kings	adult	F	CA	Fresno	Sequoia NF, Mill Flat OHV Staging Area	36.7471	-119.005	WGS84	1150		voucher in 80/legs in 100%															Coniferous riarian. Few spiders seen. Vertical/overhangs of granite boulders along stream.
SDSU_G2554	E Ciaccio	EAC 17_018	2017-09-09	Hypochilus petrunkevitchi	petrunk, Kings	adult	M	CA	Fresno	Sequoia NF, Mill Flat OHV Staging Area	36.7471	-119.005	WGS84	1150		voucher in 80/legs in 100%		prep #18 - SDSU_G2554 (Mill Flat OHV staging area is ~ 20 km W type locality from Sheep Creek, Cedar Grove, Kings Canyon)	20	72	0.277778	24	0.6	4	0.1	35	0.875	5	2		Coniferous riarian. Few spiders seen. Vertical/overhangs of granite boulders along stream.
SDSU_G2502	E Ciaccio	EAC 17_010	2017-07-30	Hypochilus petrunkevitchi	petrunk, Kings	imm		CA	Fresno	Sequoia NF, Mill Flat OHV staging area, Mill Flat Creek	36.7452	-119.005	WGS84	1550																	Coniferous riparian, E-facing. Very few spiders, majority juv. webs, mostempty/destroyed. Vert/overhangs on granite boulders and crevices.
SDSU_G2503	E Ciaccio	EAC 17_010	2017-07-30	Hypochilus petrunkevitchi	petrunk, Kings	imm		CA	Fresno	Sequoia NF, Mill Flat OHV staging area, Mill Flat Creek	36.7452	-119.005	WGS84	1550																	Coniferous riparian, E-facing. Very few spiders, majority juv. webs, mostempty/destroyed. Vert/overhangs on granite boulders and crevices.
SDSU_G2504	E Ciaccio	EAC 17_010	2017-07-30	Hypochilus petrunkevitchi	petrunk, Kings	imm		CA	Fresno	Sequoia NF, Mill Flat OHV staging area, Mill Flat Creek	36.7452	-119.005	WGS84	1550																	Coniferous riparian, E-facing. Very few spiders, majority juv. webs, mostempty/destroyed. Vert/overhangs on granite boulders and crevices.
SDSU_G2546	E Ciaccio	EAC 17_015	2017-09-08	Hypochilus petrunkevitchi	petrunk, Kings	adult	F	CA	Fresno	Sequoia NF, Ten Mile Rd., at bridge N of Hume Lake	36.7838	-118.901	WGS84	1604																	Conifer open floor. Deep in granite crevices and overhangs. Few spiders. Many empty webs/scars
SDSU_G2547	E Ciaccio	EAC 17_015	2017-09-08	Hypochilus petrunkevitchi	petrunk, Kings	imm	F	CA	Fresno	Sequoia NF, Ten Mile Rd., at bridge N of Hume Lake	36.7838	-118.901	WGS84	1604																	Conifer open floor. Deep in granite crevices and overhangs. Few spiders. Many empty webs/scars
SDSU_G2548	E Ciaccio	EAC 17_015	2017-09-08	Hypochilus petrunkevitchi	petrunk, Kings	imm		CA	Fresno	Sequoia NF, Ten Mile Rd., at bridge N of Hume Lake	36.7838	-118.901	WGS84	1604																	Conifer open floor. Deep in granite crevices and overhangs. Few spiders. Many empty webs/scars
SDSU_G2497	E Ciaccio	EAC 17_009	2017-07-29	Hypochilus petrunkevitchi	petrunk, Kings	adult	F	CA	Fresno	Sequoia NF, Ten Mile Rd., Landslide Creek turnout	36.7625	-118.88	WGS84	1780																	Conifer sparse riparian. Deep in crevices; vert/overhangs on granite boulders. Hvy conc in drain pipe.
SDSU_G2498	E Ciaccio	EAC 17_009	2017-07-29	Hypochilus petrunkevitchi	petrunk, Kings	adult	M	CA	Fresno	Sequoia NF, Ten Mile Rd., Landslide Creek turnout	36.7625	-118.88	WGS84	1780																	Conifer sparse riparian. Deep in crevices; vert/overhangs on granite boulders. Hvy conc in drain pipe.
SDSU_G2499	E Ciaccio	EAC 17_009	2017-07-29	Hypochilus petrunkevitchi	petrunk, Kings	adult	M	CA	Fresno	Sequoia NF, Ten Mile Rd., Landslide Creek turnout	36.7625	-118.88	WGS84	1780																	Conifer sparse riparian. Deep in crevices; vert/overhangs on granite boulders. Hvy conc in drain pipe.
SDSU_G2500	E Ciaccio	EAC 17_009	2017-07-29	Hypochilus petrunkevitchi	petrunk, Kings	adult	F	CA	Fresno	Sequoia NF, Ten Mile Rd., Landslide Creek turnout	36.7625	-118.88	WGS84	1780																	Conifer sparse riparian. Deep in crevices; vert/overhangs on granite boulders. Hvy conc in drain pipe.
SDSU_G2501	E Ciaccio	EAC 17_009	2017-07-29	Hypochilus petrunkevitchi	petrunk, Kings	imm	M	CA	Fresno	Sequoia NF, Ten Mile Rd., Landslide Creek turnout	36.7625	-118.88	WGS84	1780		voucher in 80/legs in 100%															Conifer sparse riparian. Deep in crevices; vert/overhangs on granite boulders. Hvy conc in drain pipe.
SDSU_G2555	E Ciaccio	EAC 17_019	2017-09-10	Hypochilus petrunkevitchi	petrunk, Kings	adult	F	CA	Fresno	Sierra NF, McKinley Grove Big Trees Area	37.0154	-119.107	WGS84	1609																	N of rd., pine open floor. Massive granite boulder "caves". Most webs empty. Highly localized.
SDSU_G2556	E Ciaccio	EAC 17_019	2017-09-10	Hypochilus petrunkevitchi	petrunk, Kings	imm		CA	Fresno	Sierra NF, McKinley Grove Big Trees Area	37.0154	-119.107	WGS84	1609																	N of rd., pine open floor. Massive granite boulder "caves". Most webs empty. Highly localized.
SDSU_G2457	E Ciaccio, B Hernadez, S Torres, J Waters	EAC 17_001	2017-07-24	Hypochilus petrunkevitchi	petrunk, Kings	imm		CA	Fresno	Sierra NF, McKinley Grove Rd., Bear Creek turnout	37.0411	-119.12	WGS84	1810																	Coniferous riparian, east of bridge (upstream). Found vertically/overhangs of large granite boulders. Both sides of stream
SDSU_G2458	E Ciaccio, B Hernadez, S Torres, J Waters	EAC 17_001	2017-07-24	Hypochilus petrunkevitchi	petrunk, Kings	imm	M	CA	Fresno	Sierra NF, McKinley Grove Rd., Bear Creek turnout	37.0411	-119.12	WGS84	1810		voucher in 80/legs in 100%															Coniferous riparian, east of bridge (upstream). Found vertically/overhangs of large granite boulders. Both sides of stream
SDSU_G2459	E Ciaccio, B Hernadez, S Torres, J Waters	EAC 17_001	2017-07-24	Hypochilus petrunkevitchi	petrunk, Kings	imm		CA	Fresno	Sierra NF, McKinley Grove Rd., Bear Creek turnout	37.0411	-119.12	WGS84	1810																	Coniferous riparian, east of bridge (upstream). Found vertically/overhangs of large granite boulders. Both sides of stream
SDSU_G2460	E Ciaccio, B Hernadez, S Torres, J Waters	EAC 17_001	2017-07-24	Hypochilus petrunkevitchi	petrunk, Kings	imm		CA	Fresno	Sierra NF, McKinley Grove Rd., Bear Creek turnout	37.0411	-119.12	WGS84	1810																	Coniferous riparian, east of bridge (upstream). Found vertically/overhangs of large granite boulders. Both sides of stream
SDSU_G2461	E Ciaccio, B Hernadez, S Torres, J Waters	EAC 17_001	2017-07-24	Hypochilus petrunkevitchi	petrunk, Kings	imm		CA	Fresno	Sierra NF, McKinley Grove Rd., Bear Creek turnout	37.0411	-119.12	WGS84	1810																	Coniferous riparian, east of bridge (upstream). Found vertically/overhangs of large granite boulders. Both sides of stream
SDSU_G2492	E Ciaccio	EAC 17_008	2017-07-29	Hypochilus petrunkevitchi	petrunk, Kings	imm		CA	Tulare	Sequoia NF, Forest Rte 14S11, Boulder Creek turnout	36.7342	-118.774	WGS84	2120																	Open coniferous riparian. Vertical overhangs on granite cliffs and boulders. E-facing side of creek; none seen on W-facing. South from bridge
SDSU_G2493	E Ciaccio	EAC 17_008	2017-07-29	Hypochilus petrunkevitchi	petrunk, Kings	adult	F	CA	Tulare	Sequoia NF, Forest Rte 14S11, Boulder Creek turnout	36.7342	-118.774	WGS84	2120		voucher in 80/legs in 100%															Open coniferous riparian. Vertical overhangs on granite cliffs and boulders. E-facing side of creek; none seen on W-facing. South from bridge
SDSU_G2494	E Ciaccio	EAC 17_008	2017-07-29	Hypochilus petrunkevitchi	petrunk, Kings	adult	F	CA	Tulare	Sequoia NF, Forest Rte 14S11, Boulder Creek turnout	36.7342	-118.774	WGS84	2120																	Open coniferous riparian. Vertical overhangs on granite cliffs and boulders. E-facing side of creek; none seen on W-facing. South from bridge
SDSU_G2495	E Ciaccio	EAC 17_008	2017-07-29	Hypochilus petrunkevitchi	petrunk, Kings	adult	F	CA	Tulare	Sequoia NF, Forest Rte 14S11, Boulder Creek turnout	36.7342	-118.774	WGS84	2120																	Open coniferous riparian. Vertical overhangs on granite cliffs and boulders. E-facing side of creek; none seen on W-facing. South from bridge
SDSU_G2496	E Ciaccio	EAC 17_008	2017-07-29	Hypochilus petrunkevitchi	petrunk, Kings	adult	F	CA	Tulare	Sequoia NF, Forest Rte 14S11, Boulder Creek turnout	36.7342	-118.774	WGS84	2120																	Open coniferous riparian. Vertical overhangs on granite cliffs and boulders. E-facing side of creek; none seen on W-facing. South from bridge
SDSU_G2510	E Ciaccio	EAC 17_012	2017-07-31	Hypochilus petrunkevitchi	petrunk, San Joaquin	imm	F	CA	Fresno	Sierra NF, Huntington Lake Rd., Balsam Creek turnout	37.1884	-119.259	WGS84	1460																	Coniferous riparian. Large granite cliff/boulder. Vert/overhang, hard to find spiders at loc.
SDSU_G2511	E Ciaccio	EAC 17_012	2017-07-31	Hypochilus petrunkevitchi	petrunk, San Joaquin	adult	F	CA	Fresno	Sierra NF, Huntington Lake Rd., Balsam Creek turnout	37.1884	-119.259	WGS84	1460																	Coniferous riparian. Large granite cliff/boulder. Vert/overhang, hard to find spiders at loc.
SDSU_G2512	E Ciaccio	EAC 17_012	2017-07-31	Hypochilus petrunkevitchi	petrunk, San Joaquin	adult	F	CA	Fresno	Sierra NF, Huntington Lake Rd., Balsam Creek turnout	37.1884	-119.259	WGS84	1460																	Coniferous riparian. Large granite cliff/boulder. Vert/overhang, hard to find spiders at loc.
SDSU_G2513	E Ciaccio	EAC 17_012	2017-07-31	Hypochilus petrunkevitchi	petrunk, San Joaquin	adult	F	CA	Fresno	Sierra NF, Huntington Lake Rd., Balsam Creek turnout	37.1884	-119.259	WGS84	1460																	Coniferous riparian. Large granite cliff/boulder. Vert/overhang, hard to find spiders at loc.
SDSU_G2514	E Ciaccio	EAC 17_012	2017-07-31	Hypochilus petrunkevitchi	petrunk, San Joaquin	adult	F	CA	Fresno	Sierra NF, Huntington Lake Rd., Balsam Creek turnout	37.1884	-119.259	WGS84	1460		voucher in 80/legs in 100%	sperm imaged														Coniferous riparian. Large granite cliff/boulder. Vert/overhang, hard to find spiders at loc.
SDSU_G2557	E Ciaccio	EAC 17_020	2017-09-10	Hypochilus petrunkevitchi	petrunk, San Joaquin	adult	F	CA	Fresno	Sierra NF, Snowslide Creek on Huntington Lake Road	37.2028	-119.237	WGS84	1513		voucher in 80/legs in 100%	sperm imaged														Thick conifer forest, both sides of stream. Empty webs, highly localized
SDSU_G2558	E Ciaccio	EAC 17_020	2017-09-10	Hypochilus petrunkevitchi	petrunk, San Joaquin	adult	F	CA	Fresno	Sierra NF, Snowslide Creek on Huntington Lake Road	37.2028	-119.237	WGS84	1513																	Thick conifer forest, both sides of stream. Empty webs, highly localized
SDSU_G2559	E Ciaccio	EAC 17_020	2017-09-10	Hypochilus petrunkevitchi	petrunk, San Joaquin	adult	F	CA	Fresno	Sierra NF, Snowslide Creek on Huntington Lake Road	37.2028	-119.237	WGS84	1513																	Thick conifer forest, both sides of stream. Empty webs, highly localized
SDSU_G2560	E Ciaccio	EAC 17_020	2017-09-10	Hypochilus petrunkevitchi	petrunk, San Joaquin	imm		CA	Fresno	Sierra NF, Snowslide Creek on Huntington Lake Road	37.2028	-119.237	WGS84	1513																	Thick conifer forest, both sides of stream. Empty webs, highly localized
SDSU_G2561	E Ciaccio, M Hedin, A Rivera	EAC 17_021	2017-09-29	Hypochilus petrunkevitchi	petrunk, Yosemite	imm		CA	Mariposa	Yosemite NP, Big Oak Flat Rd., bridge over Tamarack Creek	37.7278	-119.714	WGS84	1330																	S-facing conifer around creek. In small gronite boulder caves and outside on boulders. Only juveniles seen.
SDSU_G2562	E Ciaccio, M Hedin, A Rivera	EAC 17_021	2017-09-29	Hypochilus petrunkevitchi	petrunk, Yosemite	imm		CA	Mariposa	Yosemite NP, Big Oak Flat Rd., bridge over Tamarack Creek	37.7278	-119.714	WGS84	1330																	S-facing conifer around creek. In small gronite boulder caves and outside on boulders. Only juveniles seen.
SDSU_G2563	E Ciaccio, M Hedin, A Rivera	EAC 17_021	2017-09-29	Hypochilus petrunkevitchi	petrunk, Yosemite	imm		CA	Mariposa	Yosemite NP, Big Oak Flat Rd., bridge over Tamarack Creek	37.7278	-119.714	WGS84	1330																	S-facing conifer around creek. In small gronite boulder caves and outside on boulders. Only juveniles seen.
SDSU_G2515	E Ciaccio	EAC 17_013	2017-08-03	Hypochilus petrunkevitchi	petrunk, Yosemite	imm		CA	Mariposa	Yosemite NP, Bridalveil Falls	37.7167	-119.652	WGS84	1200																	Coniferous riparian. Massive granite boulders in forested wash. Inside "caves" of boulders. Few webs seen, most empty, most from one boulder.
SDSU_G2516	E Ciaccio	EAC 17_013	2017-08-03	Hypochilus petrunkevitchi	petrunk, Yosemite	imm		CA	Mariposa	Yosemite NP, Bridalveil Falls	37.7167	-119.652	WGS84	1200																	Coniferous riparian. Massive granite boulders in forested wash. Inside "caves" of boulders. Few webs seen, most empty, most from one boulder.
SDSU_G2517	E Ciaccio	EAC 17_013	2017-08-03	Hypochilus petrunkevitchi	petrunk, Yosemite	imm		CA	Mariposa	Yosemite NP, Bridalveil Falls	37.7167	-119.652	WGS84	1200																	Coniferous riparian. Massive granite boulders in forested wash. Inside "caves" of boulders. Few webs seen, most empty, most from one boulder.
SDSU_G2518	E Ciaccio	EAC 17_013	2017-08-03	Hypochilus petrunkevitchi	petrunk, Yosemite	imm		CA	Mariposa	Yosemite NP, Bridalveil Falls	37.7167	-119.652	WGS84	1200																	Coniferous riparian. Massive granite boulders in forested wash. Inside "caves" of boulders. Few webs seen, most empty, most from one boulder.
SDSU_G2564	E Ciaccio, M Hedin, A Rivera	EAC 17_022	2017-09-29	Hypochilus petrunkevitchi	petrunk, Yosemite	adult	F	CA	Mariposa	Yosemite NP, vic. Yosemite Falls	37.7491	-119.597	WGS84	1228		voucher in 80/legs in 100%	sperm imaged														Granite boulders left of falls. Massive boulder caves. Many adults found
SDSU_G2565	E Ciaccio, M Hedin, A Rivera	EAC 17_022	2017-09-29	Hypochilus petrunkevitchi	petrunk, Yosemite	imm		CA	Mariposa	Yosemite NP, vic. Yosemite Falls	37.7491	-119.597	WGS84	1228																	Granite boulders left of falls. Massive boulder caves. Many adults found
SDSU_G2566	E Ciaccio, M Hedin, A Rivera	EAC 17_022	2017-09-29	Hypochilus petrunkevitchi	petrunk, Yosemite	adult	F	CA	Mariposa	Yosemite NP, vic. Yosemite Falls	37.7491	-119.597	WGS84	1228																	Granite boulders left of falls. Massive boulder caves. Many adults found
SDSU_G2567	E Ciaccio, M Hedin, A Rivera	EAC 17_022	2017-09-29	Hypochilus petrunkevitchi	petrunk, Yosemite	imm		CA	Mariposa	Yosemite NP, vic. Yosemite Falls	37.7491	-119.597	WGS84	1228																	Granite boulders left of falls. Massive boulder caves. Many adults found
SDSU_G2568	E Ciaccio, M Hedin, A Rivera	EAC 17_022	2017-09-29	Hypochilus petrunkevitchi	petrunk, Yosemite	adult	M	CA	Mariposa	Yosemite NP, vic. Yosemite Falls	37.7491	-119.597	WGS84	1228		voucher in 80/legs in 100%		prep #17 - SDSU_G2568	22	85	0.258824	25	0.625	5	0.125	40	1	5	2		Granite boulders left of falls. Massive boulder caves. Many adults found
SDSU_G2569	E Ciaccio, M Hedin, A Rivera	EAC 17_022	2017-09-29	Hypochilus petrunkevitchi	petrunk, Yosemite	adult	M	CA	Mariposa	Yosemite NP, vic. Yosemite Falls	37.7491	-119.597	WGS84	1228		voucher in 80/legs in 100%			21	72	0.291667	25	0.625	4	0.1	37	0.925	5	2		Granite boulders left of falls. Massive boulder caves. Many adults found
SDSU_H0015	M Hedin, K Crandall		1992-06-27	Hypochilus petrunkevitchi	petrunk, Yosemite			CA	Mariposa	Yosemite NP, vic. Yosemite Falls	37.7487	-119.597	WGS84																		huge boulder breakdown
SDSU_H0016	M Hedin, K Crandall		1992-06-27	Hypochilus petrunkevitchi	petrunk, Yosemite			CA	Mariposa	Yosemite NP, vic. Yosemite Falls	37.7487	-119.597	WGS84																		huge boulder breakdown
SDSU_G2600	E Ciaccio, T Bougie	EAC 18_002	2018-03-26	Hypochilus xomote	xomote_CEDAR	adult	M	CA	Kern	Sequoia NF, Alder Creek CG, N-side of CG along Cedar Creek	35.7201	-118.614	WGS84	1183		voucher in 80/legs in 100%		prep #20 - G2600	20	75	0.266667	21	0.525	4	0.1	31	0.775	5	1		open floor conifer, fragmented habitat. Overhangs/walls of massive granite boulders, few highly localized pops. Many web scars and egg sacs.
SDSU_G2601	E Ciaccio, T Bougie	EAC 18_002	2018-03-26	Hypochilus xomote	xomote_CEDAR	adult	F	CA	Kern	Sequoia NF, Alder Creek CG, N-side of CG along Cedar Creek	35.7201	-118.614	WGS84	1183		voucher in 80/legs in 100%	sperm imaged														open floor conifer, fragmented habitat. Overhangs/walls of massive granite boulders, few highly localized pops. Many web scars and egg sacs.
SDSU_G2602	E Ciaccio, T Bougie	EAC 18_002	2018-03-26	Hypochilus xomote	xomote_CEDAR	adult	F	CA	Kern	Sequoia NF, Alder Creek CG, N-side of CG along Cedar Creek	35.7201	-118.614	WGS84	1183																	open floor conifer, fragmented habitat. Overhangs/walls of massive granite boulders, few highly localized pops. Many web scars and egg sacs.
SDSU_G2596	E Ciaccio, T Bougie	EAC 18_001	2018-03-25	Hypochilus xomote	xomote_CEDAR	imm		CA	Kern	Sequoia NF, Hwy 155, Cedar Creek CG	35.75	-118.581	WGS84	1510																	Conifer, On mossy granite walls and mine shafts. Many web scars seen, no adults. Highly localized
SDSU_G2597	E Ciaccio, T Bougie	EAC 18_001	2018-03-25	Hypochilus xomote	xomote_CEDAR	imm		CA	Kern	Sequoia NF, Hwy 155, Cedar Creek CG	35.75	-118.581	WGS84	1510																	Conifer, On mossy granite walls and mine shafts. Many web scars seen, no adults. Highly localized
SDSU_G2598	E Ciaccio, T Bougie	EAC 18_001	2018-03-25	Hypochilus xomote	xomote_CEDAR	imm		CA	Kern	Sequoia NF, Hwy 155, Cedar Creek CG	35.75	-118.581	WGS84	1510																	Conifer, On mossy granite walls and mine shafts. Many web scars seen, no adults. Highly localized
SDSU_G2599	E Ciaccio, T Bougie	EAC 18_001	2018-03-25	Hypochilus xomote	xomote_CEDAR	imm		CA	Kern	Sequoia NF, Hwy 155, Cedar Creek CG	35.75	-118.581	WGS84	1510																	Conifer, On mossy granite walls and mine shafts. Many web scars seen, no adults. Highly localized
SDSU_TAC000657	M Hedin, O Hedin	MCH 20_102	2020-09-05	Hypochilus xomote	xomote_CEDAR	adult	M	CA	Kern	Sequoia NF, Alder Creek CG, N-side of CG along Cedar Creek	35.7201	-118.612	WGS84	approx 1100					26	93	0.27957	27	0.675	4	0.1	43	1.075	5	2		under large granite boulder overhang, S-facing, N-side of stream
SDSU_TAC000658	M Hedin	MCH 21_091	2021-10-04	Hypochilus xomote	xomote_CEDAR	adult	M	CA	Kern	Sequoia NF, off Hwy 155, upstream of Cedar Creek CG	35.7508	-118.581	WGS84	approx 1520					20	75	0.266667	22	0.55	5	0.125	35	0.875	5	2
SDSU_TAC000659	M Hedin	MCH 21_091	2021-10-04	Hypochilus xomote	xomote_CEDAR	adult	F	CA	Kern	Sequoia NF, off Hwy 155, upstream of Cedar Creek CG	35.7508	-118.581	WGS84	approx 1520
SDSU_G2472	E Ciaccio	EAC 17_004	2017-07-28	Hypochilus xomote	xomote_TULE	adult	F	CA	Tulare	Mountain Home State Forest, Hidden Falls CG	36.2585	-118.663	WGS84	1830		voucher in 80%/legs in 100%															Conifer open floor stream. Vertically/overhangs of granite boulders. Upstream fom rd.
SDSU_G2473	E Ciaccio	EAC 17_004	2017-07-28	Hypochilus xomote	xomote_TULE	imm	M	CA	Tulare	Mountain Home State Forest, Hidden Falls CG	36.2585	-118.663	WGS84	1830		voucher in 80%/legs in 100%															Conifer open floor stream. Vertically/overhangs of granite boulders. Upstream fom rd.
SDSU_G2474	E Ciaccio	EAC 17_004	2017-07-28	Hypochilus xomote	xomote_TULE	adult	F	CA	Tulare	Mountain Home State Forest, Hidden Falls CG	36.2585	-118.663	WGS84	1830																	Conifer open floor stream. Vertically/overhangs of granite boulders. Upstream fom rd.
SDSU_G2475	E Ciaccio	EAC 17_004	2017-07-28	Hypochilus xomote	xomote_TULE	imm	F	CA	Tulare	Mountain Home State Forest, Hidden Falls CG	36.2585	-118.663	WGS84	1830																	Conifer open floor stream. Vertically/overhangs of granite boulders. Upstream fom rd.
SDSU_G2476	E Ciaccio	EAC 17_004	2017-07-28	Hypochilus xomote	xomote_TULE	imm	M	CA	Tulare	Mountain Home State Forest, Hidden Falls CG	36.2585	-118.663	WGS84	1830																	Conifer open floor stream. Vertically/overhangs of granite boulders. Upstream fom rd.
SDSU_G2477	E Ciaccio	EAC 17_005	2017-07-28	Hypochilus xomote	xomote_TULE	adult	F	CA	Tulare	Sequoia NF, Balch Park Road, Jenny Creek	36.2843	-118.733	WGS84	1340		voucher in 80%/legs in 100%	sperm imaged														Conifer/deciduous riparian. Hvy conc. In drainpipe. Vert/overhangs on granite rocks. Webs intermingled w/other species
SDSU_G2478	E Ciaccio	EAC 17_005	2017-07-28	Hypochilus xomote	xomote_TULE	adult	F	CA	Tulare	Sequoia NF, Balch Park Road, Jenny Creek	36.2843	-118.733	WGS84	1340																	Conifer/deciduous riparian. Hvy conc. In drainpipe. Vert/overhangs on granite rocks. Webs intermingled w/other species
SDSU_G2479	E Ciaccio	EAC 17_005	2017-07-28	Hypochilus xomote	xomote_TULE	adult	F	CA	Tulare	Sequoia NF, Balch Park Road, Jenny Creek	36.2843	-118.733	WGS84	1340																	Conifer/deciduous riparian. Hvy conc. In drainpipe. Vert/overhangs on granite rocks. Webs intermingled w/other species
SDSU_G2480	E Ciaccio	EAC 17_005	2017-07-28	Hypochilus xomote	xomote_TULE	adult	F	CA	Tulare	Sequoia NF, Balch Park Road, Jenny Creek	36.2843	-118.733	WGS84	1340																	Conifer/deciduous riparian. Hvy conc. In drainpipe. Vert/overhangs on granite rocks. Webs intermingled w/other species
SDSU_G2481	E Ciaccio	EAC 17_005	2017-07-28	Hypochilus xomote	xomote_TULE	adult	F	CA	Tulare	Sequoia NF, Balch Park Road, Jenny Creek	36.2843	-118.733	WGS84	1340																	Conifer/deciduous riparian. Hvy conc. In drainpipe. Vert/overhangs on granite rocks. Webs intermingled w/other species
SDSU_G2462	E Ciaccio	EAC 17_002	2017-07-27	Hypochilus xomote	xomote_TULE	pen	M	CA	Tulare	Sequoia NF, Forest Rte. 21S94, Windy Creek turnout	36.081	-118.606	WGS84	1890		voucher in 80%/legs in 100%															Coniferous riparian. Hvy conc in dainpipe. Vert/overhangs granite rocks. Webs mingled w/other species (tetragnaths). Prey items seen (gnaphosids?)
SDSU_G2463	E Ciaccio	EAC 17_002	2017-07-27	Hypochilus xomote	xomote_TULE	adult	F	CA	Tulare	Sequoia NF, Forest Rte. 21S94, Windy Creek turnout	36.081	-118.606	WGS84	1890																	Coniferous riparian. Hvy conc in dainpipe. Vert/overhangs granite rocks. Webs mingled w/other species (tetragnaths). Prey items seen (gnaphosids?)
SDSU_G2464	E Ciaccio	EAC 17_002	2017-07-27	Hypochilus xomote	xomote_TULE	pen	M	CA	Tulare	Sequoia NF, Forest Rte. 21S94, Windy Creek turnout	36.081	-118.606	WGS84	1890																	Coniferous riparian. Hvy conc in dainpipe. Vert/overhangs granite rocks. Webs mingled w/other species (tetragnaths). Prey items seen (gnaphosids?)
SDSU_G2465	E Ciaccio	EAC 17_002	2017-07-27	Hypochilus xomote	xomote_TULE	adult	F	CA	Tulare	Sequoia NF, Forest Rte. 21S94, Windy Creek turnout	36.081	-118.606	WGS84	1890		voucher in 80%/legs in 100%	sperm imaged														Coniferous riparian. Hvy conc in dainpipe. Vert/overhangs granite rocks. Webs mingled w/other species (tetragnaths). Prey items seen (gnaphosids?)
SDSU_G2466	E Ciaccio	EAC 17_002	2017-07-27	Hypochilus xomote	xomote_TULE	adult	F	CA	Tulare	Sequoia NF, Forest Rte. 21S94, Windy Creek turnout	36.081	-118.606	WGS84	1890																	Coniferous riparian. Hvy conc in dainpipe. Vert/overhangs granite rocks. Webs mingled w/other species (tetragnaths). Prey items seen (gnaphosids?)
SDSU_G2296	E Ciaccio	EAC 16_011	2016-09-23	Hypochilus xomote	xomote_TULE	adult	F	CA	Tulare	Sequoia NF, Hwy 190 turnout, Belknap Creek	36.1534	-118.598	WGS84	1700		voucher in 80/legs in 100%	sperm imaged														Coniferous forest, along running creek. On walls and overhangs of rock outcrops
SDSU_G2297	E Ciaccio	EAC 16_011	2016-09-23	Hypochilus xomote	xomote_TULE	adult	F	CA	Tulare	Sequoia NF, Hwy 190 turnout, Belknap Creek	36.1534	-118.598	WGS84	1700																	Coniferous forest, along running creek. On walls and overhangs of rock outcrops
SDSU_G2298	E Ciaccio	EAC 16_011	2016-09-23	Hypochilus xomote	xomote_TULE	adult	F	CA	Tulare	Sequoia NF, Hwy 190 turnout, Belknap Creek	36.1534	-118.598	WGS84	1700																	Coniferous forest, along running creek. On walls and overhangs of rock outcrops
SDSU_G2299	E Ciaccio	EAC 16_011	2016-09-23	Hypochilus xomote	xomote_TULE	adult	F	CA	Tulare	Sequoia NF, Hwy 190 turnout, Belknap Creek	36.1534	-118.598	WGS84	1700																	Coniferous forest, along running creek. On walls and overhangs of rock outcrops
SDSU_G2300	E Ciaccio	EAC 16_011	2016-09-23	Hypochilus xomote	xomote_TULE	adult	M	CA	Tulare	Sequoia NF, Hwy 190 turnout, Belknap Creek	36.1534	-118.598	WGS84	1700		voucher in 80/legs in 100%		prep #22 - G2300, Belknap	23	68	0.338235	21	0.525	4	0.1	33	0.825	4	1		Coniferous forest, along running creek. On walls and overhangs of rock outcrops
SDSU_G2467	E Ciaccio	EAC 17_003	2017-07-27	Hypochilus xomote	xomote_TULE	adult	F	CA	Tulare	Sequoia NF, Hwy 190, McIntyre Creek turnout	36.1509	-118.583	WGS84	1770		voucher in 80/legs in 100%															Conifer open stream, good shade. Large pop, mingled with other arachnids (tetragnaths, theridiids, harvestmen).
SDSU_G2468	E Ciaccio	EAC 17_003	2017-07-27	Hypochilus xomote	xomote_TULE	adult	F	CA	Tulare	Sequoia NF, Hwy 190, McIntyre Creek turnout	36.1509	-118.583	WGS84	1770																	Conifer open stream, good shade. Large pop, mingled with other arachnids (tetragnaths, theridiids, harvestmen).
SDSU_G2469	E Ciaccio	EAC 17_003	2017-07-27	Hypochilus xomote	xomote_TULE	adult	F	CA	Tulare	Sequoia NF, Hwy 190, McIntyre Creek turnout	36.1509	-118.583	WGS84	1770																	Conifer open stream, good shade. Large pop, mingled with other arachnids (tetragnaths, theridiids, harvestmen).
SDSU_G2470	E Ciaccio	EAC 17_003	2017-07-27	Hypochilus xomote	xomote_TULE	imm	M	CA	Tulare	Sequoia NF, Hwy 190, McIntyre Creek turnout	36.1509	-118.583	WGS84	1770																	Conifer open stream, good shade. Large pop, mingled with other arachnids (tetragnaths, theridiids, harvestmen).
SDSU_G2471	E Ciaccio	EAC 17_003	2017-07-27	Hypochilus xomote	xomote_TULE	imm		CA	Tulare	Sequoia NF, Hwy 190, McIntyre Creek turnout	36.1509	-118.583	WGS84	1770																	Conifer open stream, good shade. Large pop, mingled with other arachnids (tetragnaths, theridiids, harvestmen).
SDSU_G2289	E Ciaccio	EAC 16_010	2016-09-23	Hypochilus xomote	xomote_TULE	adult	M	CA	Tulare	Sequoia NF, Hwy 190, Middle Fork Tule River, turnoff on 190	36.1556	-118.669	WGS84	1080		voucher in 80/legs in 100%		prep #21 - G2289, Middle Fork Tule River	23	90	0.255556	23	0.575	6	0.15	41	1.025	5	2		Down trail, along river on rock overhangs. Oak riparian.
SDSU_G2290	E Ciaccio	EAC 16_010	2016-09-23	Hypochilus xomote	xomote_TULE	adult	F	CA	Tulare	Sequoia NF, Hwy 190, Middle Fork Tule River, turnoff on 190	36.1556	-118.669	WGS84	1080		voucher in 80/legs in 100%															Down trail, along river on rock overhangs. Oak riparian.
SDSU_G2291	E Ciaccio	EAC 16_010	2016-09-23	Hypochilus xomote	xomote_TULE	adult	F	CA	Tulare	Sequoia NF, Hwy 190, Middle Fork Tule River, turnoff on 190	36.1556	-118.669	WGS84	1080																	Down trail, along river on rock overhangs. Oak riparian.
SDSU_G2292	E Ciaccio	EAC 16_010	2016-09-23	Hypochilus xomote	xomote_TULE	adult	F	CA	Tulare	Sequoia NF, Hwy 190, Middle Fork Tule River, turnoff on 190	36.1556	-118.669	WGS84	1080																	Down trail, along river on rock overhangs. Oak riparian.
SDSU_G2293	E Ciaccio	EAC 16_010	2016-09-23	Hypochilus xomote	xomote_TULE	adult	F	CA	Tulare	Sequoia NF, Hwy 190, Middle Fork Tule River, turnoff on 190	36.1556	-118.669	WGS84	1080																	Down trail, along river on rock overhangs. Oak riparian.
SDSU_G2294	E Ciaccio	EAC 16_010	2016-09-23	Hypochilus xomote	xomote_TULE	imm	M	CA	Tulare	Sequoia NF, Hwy 190, Middle Fork Tule River, turnoff on 190	36.1556	-118.669	WGS84	1080																	Down trail, along river on rock overhangs. Oak riparian.
SDSU_G2295	E Ciaccio	EAC 16_010	2016-09-23	Hypochilus xomote	xomote_TULE	adult	F	CA	Tulare	Sequoia NF, Hwy 190, Middle Fork Tule River, turnoff on 190	36.1556	-118.669	WGS84	1080																	Down trail, along river on rock overhangs. Oak riparian.
SDSU_G2307	E Ciaccio	EAC 16_013	2016-09-24	Hypochilus xomote	xomote_TULE	adult	F	CA	Tulare	Sequoia NF, North Fork Middle Fork Tule River	36.2082	-118.649	WGS84	1375		voucher in 80/legs in 100%															On canyon walls and rock outcroppings. Coniferous/oak riparian.
SDSU_G2308	E Ciaccio	EAC 16_013	2016-09-24	Hypochilus xomote	xomote_TULE	adult	F	CA	Tulare	Sequoia NF, North Fork Middle Fork Tule River	36.2082	-118.649	WGS84	1375																	On canyon walls and rock outcroppings. Coniferous/oak riparian.
SDSU_G2309	E Ciaccio	EAC 16_013	2016-09-24	Hypochilus xomote	xomote_TULE	adult	F	CA	Tulare	Sequoia NF, North Fork Middle Fork Tule River	36.2082	-118.649	WGS84	1375																	On canyon walls and rock outcroppings. Coniferous/oak riparian.
SDSU_G2310	E Ciaccio	EAC 16_013	2016-09-24	Hypochilus xomote	xomote_TULE	adult	F	CA	Tulare	Sequoia NF, North Fork Middle Fork Tule River	36.2082	-118.649	WGS84	1375																	On canyon walls and rock outcroppings. Coniferous/oak riparian.
SDSU_G2311	E Ciaccio	EAC 16_013	2016-09-24	Hypochilus xomote	xomote_TULE	adult	M	CA	Tulare	Sequoia NF, North Fork Middle Fork Tule River	36.2082	-118.649	WGS84	1375		voucher in 80/legs in 100%			24	90	0.266667	23	0.575	5	0.125	38	0.95	4	2		On canyon walls and rock outcroppings. Coniferous/oak riparian.
SDSU_G2301	E Ciaccio	EAC 16_012	2016-09-23	Hypochilus xomote	xomote_TULE	imm	F	CA	Tulare	Sequoia NF, Rd. 208, North Fork Middle Fork Tule River	36.1879	-118.677	WGS84	1075																	On walls and overhangs of rock outcrops along river. Oak riparian.
SDSU_G2302	E Ciaccio	EAC 16_012	2016-09-23	Hypochilus xomote	xomote_TULE	adult	F	CA	Tulare	Sequoia NF, Rd. 208, North Fork Middle Fork Tule River	36.1879	-118.677	WGS84	1075		voucher in 80/legs in 100%															On walls and overhangs of rock outcrops along river. Oak riparian.
SDSU_G2303	E Ciaccio	EAC 16_012	2016-09-23	Hypochilus xomote	xomote_TULE	adult	F	CA	Tulare	Sequoia NF, Rd. 208, North Fork Middle Fork Tule River	36.1879	-118.677	WGS84	1075																	On walls and overhangs of rock outcrops along river. Oak riparian.
SDSU_G2304	E Ciaccio	EAC 16_012	2016-09-23	Hypochilus xomote	xomote_TULE	adult	F	CA	Tulare	Sequoia NF, Rd. 208, North Fork Middle Fork Tule River	36.1879	-118.677	WGS84	1075																	On walls and overhangs of rock outcrops along river. Oak riparian.
SDSU_G2305	E Ciaccio	EAC 16_012	2016-09-23	Hypochilus xomote	xomote_TULE	adult	F	CA	Tulare	Sequoia NF, Rd. 208, North Fork Middle Fork Tule River	36.1879	-118.677	WGS84	1075																	On walls and overhangs of rock outcrops along river. Oak riparian.
SDSU_G2306	E Ciaccio	EAC 16_012	2016-09-23	Hypochilus xomote	xomote_TULE	adult	F	CA	Tulare	Sequoia NF, Rd. 208, North Fork Middle Fork Tule River	36.1879	-118.677	WGS84	1075																	On walls and overhangs of rock outcrops along river. Oak riparian.
SDSU_TAC000191	M Hedin, M Lowder	MCH 01_124	2001-07-09	Hypochilus kastoni	kastoni	adult	M	CA	Siskiyou	Ney Springs Creek, SE of Box Canyon Dam	41.2619	-122.331	WGS84					prep #16 - MCH 01_124, TAC000191
	M Hedin, J Starrett, S Thomas, R Keith, L Hedin	MCH 04_028	2004-08-07	Hypochilus pococki	pococki, VA	adult	M	VA	Scott	Cliff Mtn, Dry Branch, County Rd 655	36.7495	-82.7787	WGS84					prep #1, MCH 04_028
	M Hedin, J Starrett, S Thomas, R Keith, L Hedin	MCH 04_027	2004-08-07	Hypochilus pococki	pococki, VA	adult	M	VA	Wise	above Guest River, County Rd 660, SE Coeburn	36.9009	-82.4147	WGS84					prep #8, MCH 04_027
	M Hedin, M Lowder	MCH 01_144	2001-08-21	Hypochilus pococki	pococki, CENTRAL	adult	M	NC	Madison	East Prong Hickory Fork Creek, off Hwy 212	35.999	-82.7033	WGS84					prep #9, MCH 01_144
	M Hedin, M Lowder, P Paquin	MCH 02_185	2002-09-03	Hypochilus pococki	pococki, CENTRAL	adult	M	NC	Swain	GSMNP, road to Balsam Mtn, N Black Camp Gap	35.5437	-83.1679	WGS84					prep #10, MCH 02_185
	M Hedin, M Lowder	MCH 01_181	2001-08-28	Hypochilus pococki	pococki, CENTRAL	adult	M	NC	Transylvania	Hwy 276, 2 mi. S BRP, S Wagon Road Gap	35.3682	-82.7862	WGS84					prep #11, MCH 01_181
	M Hedin, M Lowder, P Paquin	MCH 02_168	2002-08-28	Hypochilus pococki	pocoki, WEST	adult	M	NC	Swain	Alarka Road, N Deep Gap church	35.3482	-83.4064	WGS84					prep #2, MCH 02_168
	M Hedin, M Lowder, P Paquin	MCH 02_156	2002-08-26	Hypochilus pococki	pocoki, WEST	adult	M	TN	McMinn	N end of Starr Mountain	35.342	-84.4076	WGS84					prep #7, MCH 02_156
	M Hedin, M Lowder, P Paquin, F Coyle	MCH 02_142	2002-08-20	Hypochilus pococki	pocoki, WEST	adult	M	NC	Macon	0.2 mi. N Deep Gap, Chunky Gal Mountain	35.0425	-83.555	WGS84					prep #12, MCH 02_142
	M Hedin, J Starrett, S Thomas, R Keith, L Hedin	MCH 04_025	2004-08-07	Hypochilus pococki	pocoki, WEST	adult	M	TN	Johnson	Backbone Rock Rec Area, S of Sutherland	36.594	-81.8163	WGS84					prep #6, MCH 04_025
	M Hedin, M Lowder	MCH 01_155	2001-08-22	Hypochilus pococki	pococki, ELK	adult	M	NC	Avery	Elk River Cave, ~ 1 mi S Elk River Falls	36.1892	-81.9617	WGS84					prep #4, MCH 01_155
	M Hedin, M Lowder, F Coyle, P Paquin, N Duperre	MCH 01_165	2001-08-25	Hypochilus pococki	pococki, ELK	adult	M	NC	Burke	Linville Gorge, opposite Bull branch	35.9396	-81.9219	WGS84					prep #5, MCH 01_165
	M Hedin, M Lowder	MCH 01_159	2001-08-23	Hypochilus pococki	pococki, NE	adult	M	NC	Caldwell	Boone Fork CG, S of Chestnut Mtn	36.0071	-81.6166	WGS84					prep #3, MCH 01_159
	M Hedin, M Lowder	MCH 01_162	2001-08-24	Hypochilus pococki	pococki, NE	adult	M	NC	Watauga/Caldwell	Green Mtn., Hwy 221, crossing of Green Mtn. Creek	36.1142	-81.7782	WGS84					prep #13, MCH 01_162
																	holotype male	abd	45	4.5		@1X
																	SDSU_TAC000658	car L	30	3		@1X	10 = 1 mm
																		car W	24	2.4		@1X
																		clyp	4	0.1		@4X	40 = 1 mm
																		AME	5	0.125		@4X	40 = 1 mm
																		ALE	9	0.225		@4X	40 = 1 mm
																		PME	7	0.175		@4X	40 = 1 mm
																		PLE	8	0.2		@4X	40 = 1 mm
																		PTW	20	0.5		@4X	40 = 1 mm
																		PTL	75	1.875		@4X	40 = 1 mm
																	paratype female	abd	80	8		@1X
																	SDSU_TAC000659	car L	38	3.8		@1X	10 = 1 mm
																		car W	31	3.1		@1X
																		clyp	8	0.2		@4X	40 = 1 mm
																		AME	7	0.175		@4X	40 = 1 mm
																		ALE	11	0.275		@4X	40 = 1 mm
																		PME	9	0.225		@4X	40 = 1 mm
																		PLE	8	0.2		@4X	40 = 1 mm
